# Supplementary material for: Optimizing Thermoelectric Performance of Hybrid Crystals Bi2O2Se1−xTex in the Bi2O2X System
Source: MDPI journal article supplement (doi:10.3390/ma17071509), 2024-03-26
Supplement: s1 [file s1]

# Supporting information

## Optimizing Thermoelectric Performance of Mixed Crystals $\text{Bi}_2\text{O}_2\text{Se}_{1-x}\text{Te}_x$ in the $\text{Bi}_2\text{O}_2\text{Se}/\text{Bi}_2\text{O}_2\text{Te}$ Pseudobinary Bulk System

Fan Xie, Zhiyao Ma, Jian Zhou

School of Materials Science and Engineering, Key Laboratory for Polymeric Composite and Functional Materials of Ministry of Education, Guangzhou Key Laboratory of Flexible Electronic Materials and Wearable Devices, Laboratory of Advanced Electronics and Fiber Materials, Sun Yat-sen University, Guangzhou, Guangdong, 510275 China

Email: zhouj296@mail.sysu.edu.cn (Jian Zhou)

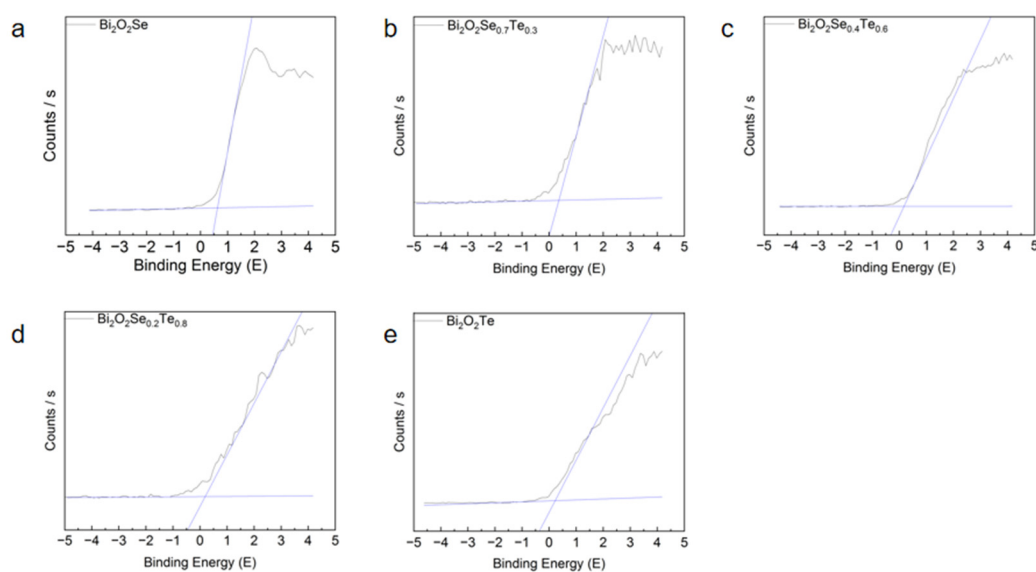

**Figure S1.** The valence band of samples. The valence band of  $\text{Bi}_2\text{O}_2\text{Se}$ (a),  $\text{Bi}_2\text{O}_2\text{Se}_{0.7}\text{Te}_{0.3}$ (b),  $\text{Bi}_2\text{O}_2\text{Se}_{0.4}\text{Te}_{0.6}$ (c),  $\text{Bi}_2\text{O}_2\text{Se}_{0.2}\text{Te}_{0.8}$ (d) and  $\text{Bi}_2\text{O}_2\text{Te}$ (e).

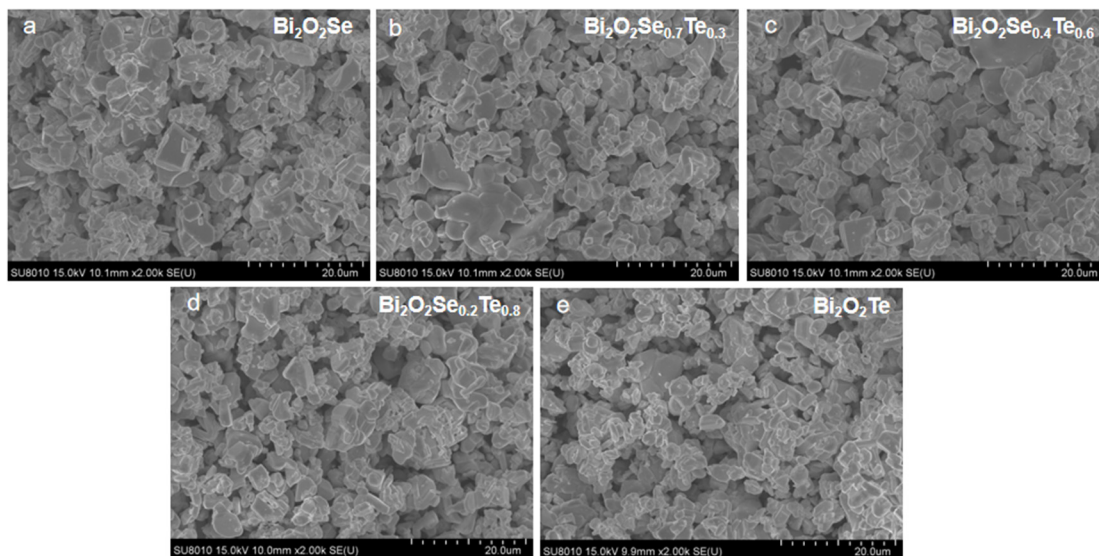

**Figure S2.** SEM of samples. SEM images of all  $\text{Bi}_2\text{O}_2\text{Se}_{1-x}\text{Te}_x$  samples including  $\text{Bi}_2\text{O}_2\text{Se}$  (a),  $\text{Bi}_2\text{O}_2\text{Se}_{0.7}\text{Te}_{0.3}$  (b),  $\text{Bi}_2\text{O}_2\text{Se}_{0.4}\text{Te}_{0.6}$  (c),  $\text{Bi}_2\text{O}_2\text{Se}_{0.2}\text{Te}_{0.8}$  (d) and  $\text{Bi}_2\text{O}_2\text{Te}$  (e). We measured the average size of each sample from the SEM plots, and the average size of these particles was calculated to be  $3.4 \pm 0.7$ ,  $3.2 \pm 0.9$ ,  $3.9 \pm 1.0$ ,  $4.2 \pm 0.8$ , and  $2.6 \pm 0.6$   $\mu\text{m}$  for different Te doping levels of  $\text{Bi}_2\text{O}_2\text{Se}_{1-x}\text{Te}_x$  ( $x=0, 0.2, 0.4, 0.7, 1$ ).

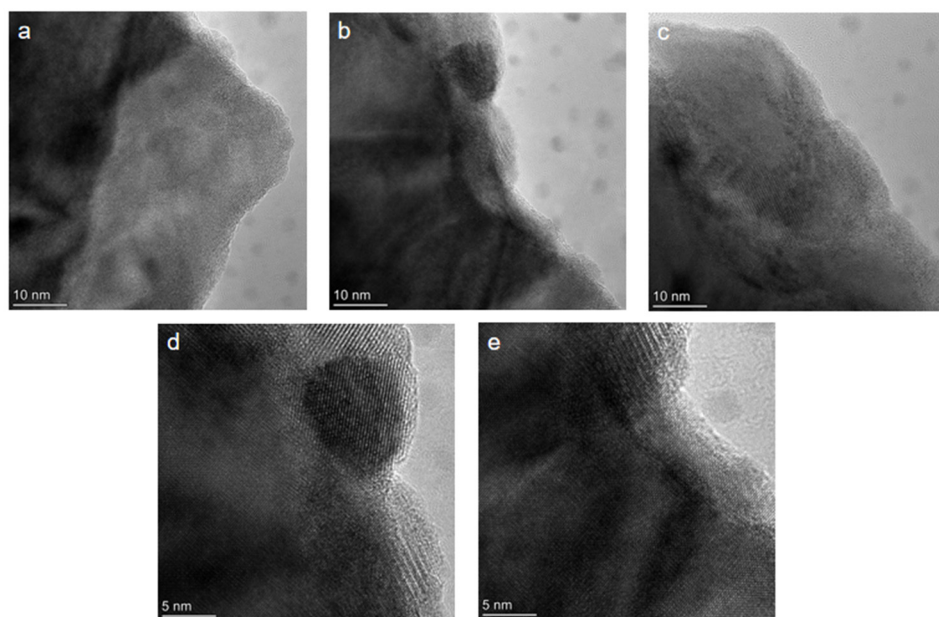

**Figure S3.** (a-e) TEM of  $\text{Bi}_2\text{O}_2\text{Se}_{0.4}\text{Te}_{0.6}$ . TEM images of  $\text{Bi}_2\text{O}_2\text{Se}_{0.4}\text{Te}_{0.6}$  compounds.

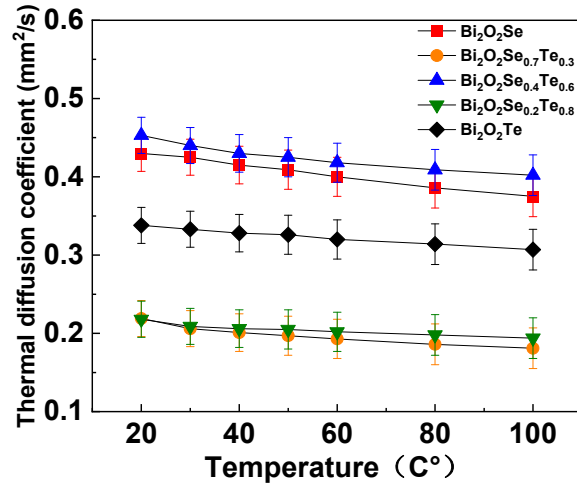

**Figure S4.** The thermal diffusion coefficient of Bi<sub>2</sub>O<sub>2</sub>Se, Bi<sub>2</sub>O<sub>2</sub>Se<sub>0.7</sub>Te<sub>0.3</sub>, Bi<sub>2</sub>O<sub>2</sub>Se<sub>0.4</sub>Te<sub>0.6</sub>, Bi<sub>2</sub>O<sub>2</sub>Se<sub>0.2</sub>Te<sub>0.8</sub> and Bi<sub>2</sub>O<sub>2</sub>Te at different temperatures.

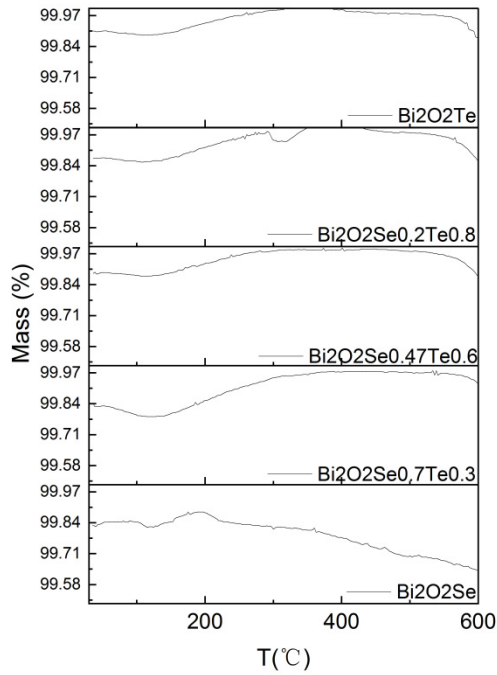

**Figure S5.** The TGA show the relationship between Mass and temperature of Bi<sub>2</sub>O<sub>2</sub>Se, Bi<sub>2</sub>O<sub>2</sub>Se<sub>0.7</sub>Te<sub>0.3</sub>, Bi<sub>2</sub>O<sub>2</sub>Se<sub>0.4</sub>Te<sub>0.6</sub>, Bi<sub>2</sub>O<sub>2</sub>Se<sub>0.2</sub>Te<sub>0.8</sub> and Bi<sub>2</sub>O<sub>2</sub>Te. It means that the material is able to efficiently convert waste heat into electricity in a variety of practical scenarios, while maintaining long-term stability and reliability.

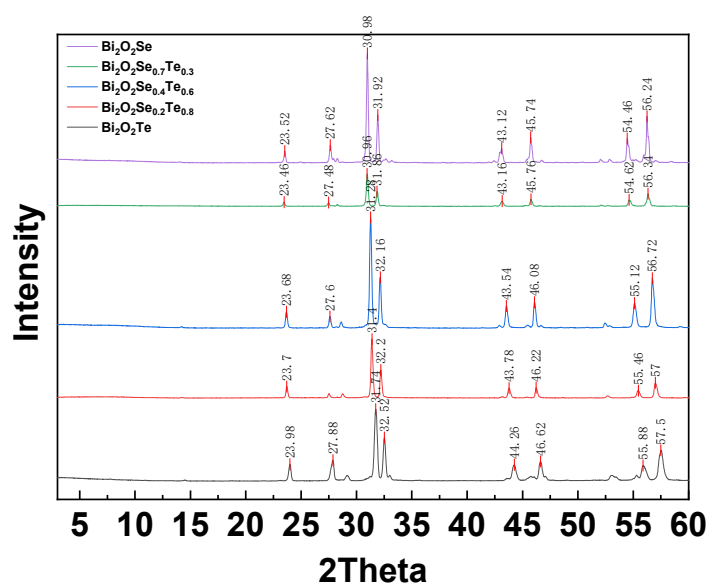

**Figure S6.** XRD of samples  $\text{Bi}_2\text{O}_2\text{Se}$ ,  $\text{Bi}_2\text{O}_2\text{Se}_{0.7}\text{Te}_{0.3}$ ,  $\text{Bi}_2\text{O}_2\text{Se}_{0.4}\text{Te}_{0.6}$ ,  $\text{Bi}_2\text{O}_2\text{Se}_{0.2}\text{Te}_{0.8}$  and  $\text{Bi}_2\text{O}_2\text{Te}$  after heating at  $600^\circ\text{C}$ .

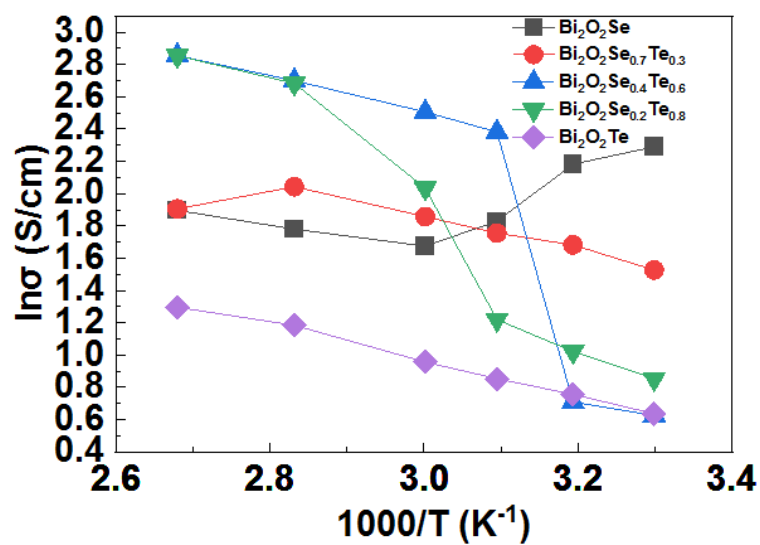

**Figure S7.** Arrhenius plot of samples.
